# Supplementary material for: Clinical significance and risk factors for new onset and recurring atrial fibrillation following cardiac surgery - a retrospective data analysis
Source: BMC Anesthesiol. 2017 Dec 2;17:163. doi: 10.1186/s12871-017-0455-7 (PMC5712135; doi:10.1186/s12871-017-0455-7)
Supplement: Supplementary file 2 — Supplementary material (Figure S1: Plasma creatinine concentration changes over the time course of ICU stay, Figure S2: Horowitz index over the time course of ICU stay for new onse AF vs no AF patients and Figure S3: Plasma phosphate concentration changes over the time course of ICU stay for disappeared AF vs intermittent/permanent AF patients). (DOCX 391 kb) [file 12871_2017_455_MOESM2_ESM.docx]

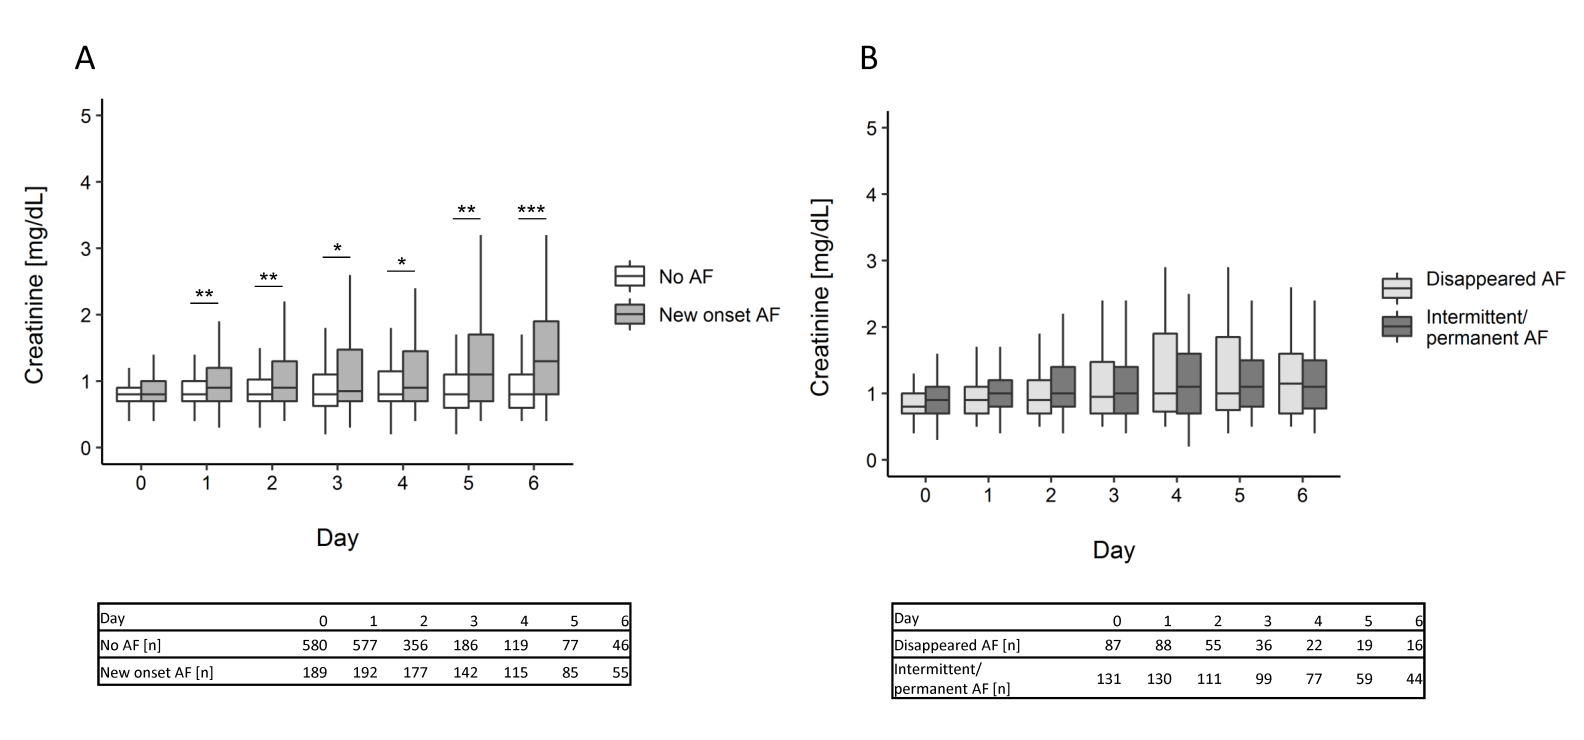


Figure S1: Plasma creatinine concentration changes over the time course of ICU stay

**A** Patients without atrial fibrillation (AF) versus patients with new onset AF. **B** Patients with disappeared AF versus patients with intermittent/permanent AF. Data are shown as median with 1st and 3rd quartile and minimum and maximum without outliers. Number of patients on each day is displayed under the graphs.

*** p<0.001, ** p<0.01, * p<0.05 (Wilcoxon-Mann-Whitney test)


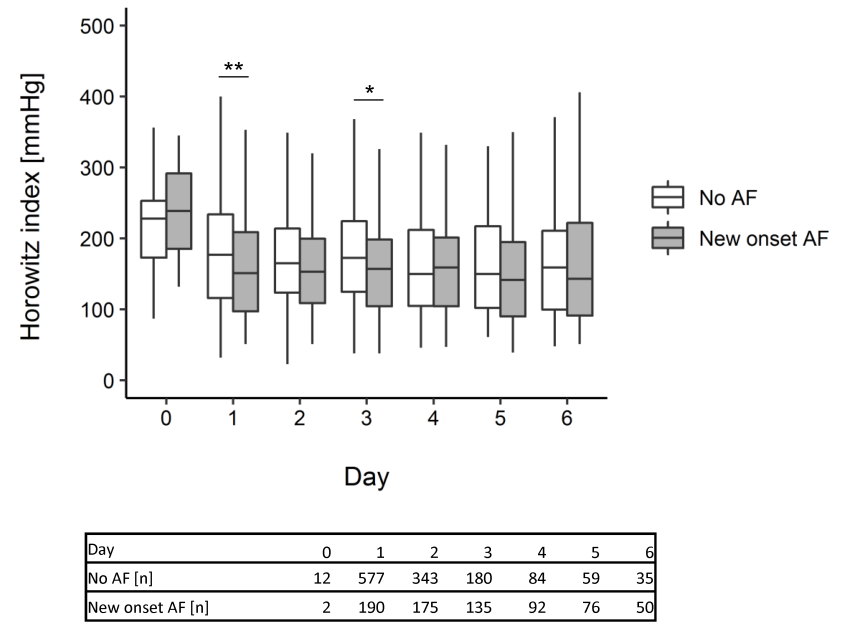


Figure S2: Horowitz index over the time course of ICU stay for new onse AF vs no AF patients

Data are shown as median with 1st and 3rd quartile and minimum and maximum without outliers. Number of patients on each day is displayed under the graphs.

** p<0.01, * p<0.05 (Wilcoxon-Mann-Whitney test)


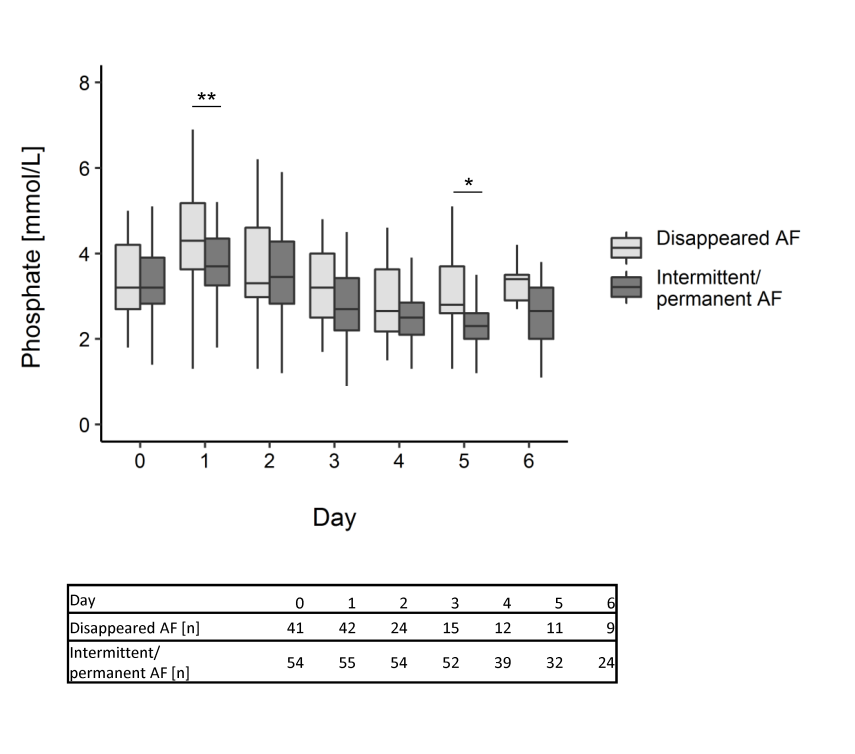


Figure S3: Plasma phosphate concentration changes over the time course of ICU stay for disappeared AF vs intermittent/permanent AF patients

Data are shown as median with 1st and 3rd quartile and minimum and maximum without outliers. Number of patients on each day is displayed under the graphs.

** p<0.01, * p<0.05 (Wilcoxon-Mann-Whitney test)
